# Supplementary material for: Multiple MoS2 Transistors for Sensing Molecule Interaction Kinetics
Source: PubMed Central journal article supplement (PMC4444958; doi:10.1038/srep10546), 2015-05-27
Supplement: srep10546-s1.pdf [file srep10546-s1.pdf]

# Multiple MoS<sub>2</sub> Transistors for Sensing Molecule Interaction Kinetics

*Hongsuk Nam<sup>1, †</sup>, Bo-Ram Oh<sup>1, †</sup>, Pengyu Chen<sup>1</sup>, Mikai Chen<sup>1</sup>, Sungjin Wi<sup>1</sup>, Wenjie  
Wan<sup>2</sup>, Katsuo Kurabayashi<sup>1</sup>, and Xiaogan Liang<sup>\*,1</sup>*

<sup>1</sup> Department of Mechanical Engineering, University of Michigan, Ann Arbor, MI 48109

<sup>2</sup> University of Michigan-Shanghai Jiao Tong University Joint Institute and Department of  
Physics and Astronomy, Shanghai Jiao Tong University, Shanghai 200240, China

\*Contact Email: [xiaoganl@umich.edu](mailto:xiaoganl@umich.edu)

<sup>†</sup>These authors contributed equally

**Supporting Information**

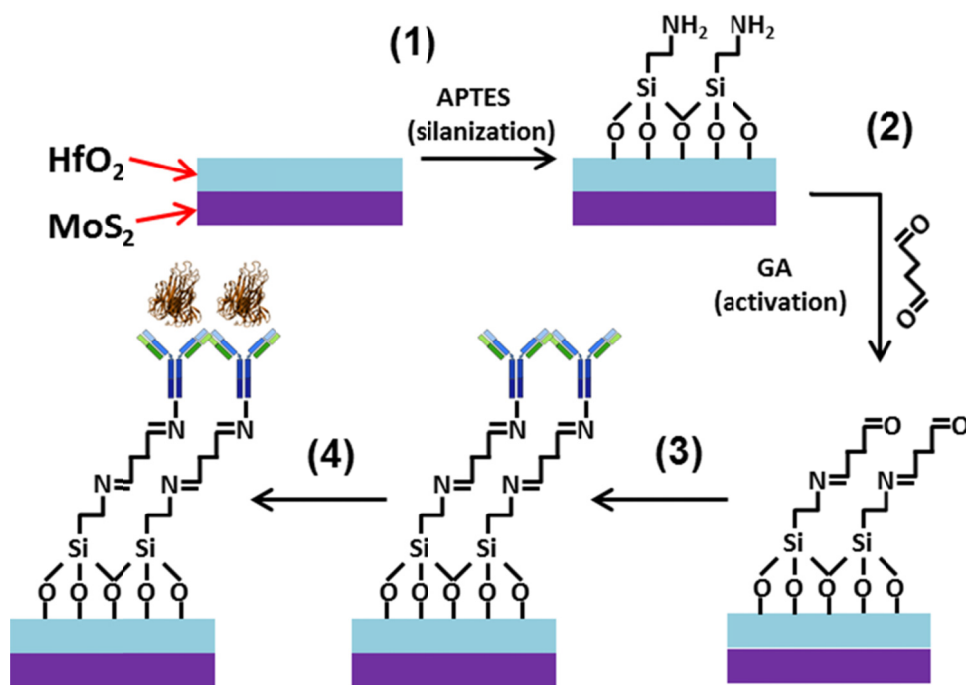

**Figure S1.** Protocol for functionalizing a  $\text{MoS}_2$  transistor sensor with anti-human TNF- $\alpha$  antibody receptors for detecting TNF- $\alpha$  molecules: (1) Immerse the  $\text{HfO}_2$ -coated  $\text{MoS}_2$  transistor sensor into a 5% APTES solution and incubate for 1 hour. (2) The  $\text{HfO}_2$  surface silanized with APTES reacts with a 5% solution of glutaraldehyde (GA) in phosphate buffered saline (PBS) for 2 hours, followed by rinsing with PBS buffer. (3) The  $\text{HfO}_2$  surface is then incubated with an anti-human TNF- $\alpha$  antibody solution for 1 hour. (4) The as-functionalized sensor is incubated with TNF- $\alpha$  solutions with incremental concentrations (2 hours for each concentration) for studying the sensor responses at the equilibrium state and the affinity of the antibody-(TNF- $\alpha$ ) pair, or the device is subjected to a TNF- $\alpha$  flow in a microfluidic channel for quantifying the time-dependent association/dissociation kinetics of the antibody-(TNF- $\alpha$ ) pair.

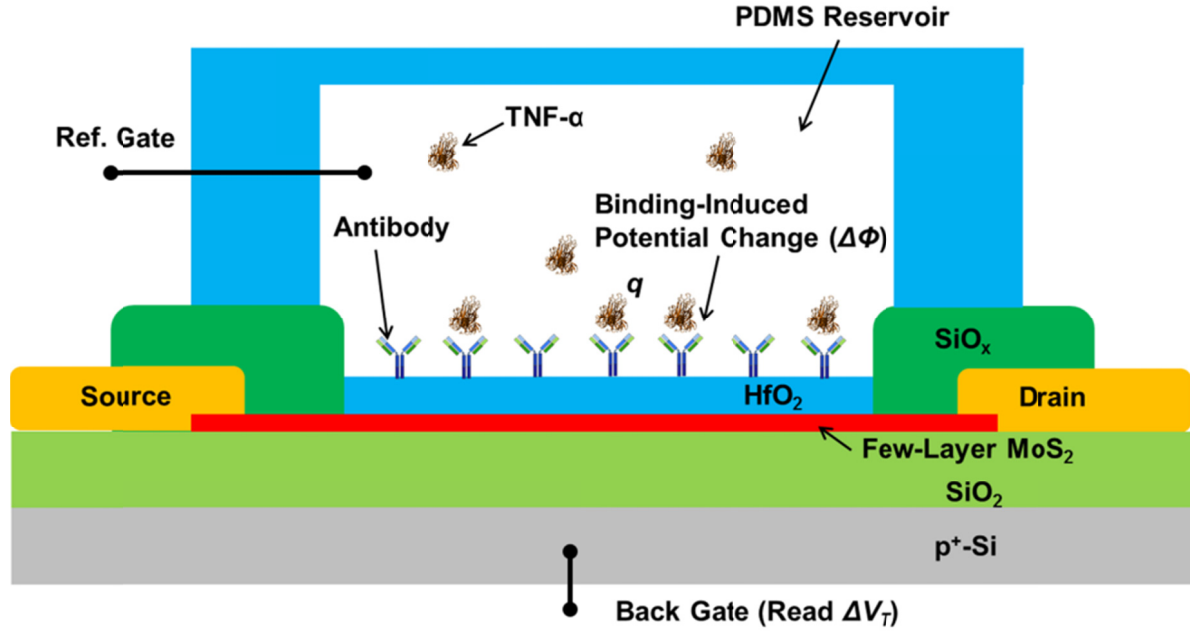

**Figure S2.** The dual-gate thin-film transistor biosensor model: The binding of TNF- $\alpha$  molecules with the antibody receptors functionalized on the HfO<sub>2</sub> effective layer can cause a potential change ( $\Delta\Phi$ ) on this effective layer.  $\Delta\Phi$  can be evaluated using  $\Delta\Phi = \frac{qN_{TNF}}{C_{HfO_2}}$ , where  $q$  is the

effective charge brought to the HfO<sub>2</sub> effective layer through a single antibody-(TNF- $\alpha$ ) binding event (here,  $q$  is the effective charge sensed by the transistor, and the screening effect due to the electrical double layer in solvent has been involved into  $q$ );  $N_{TNF}$  is the total number of TNF- $\alpha$  molecules bound to the HfO<sub>2</sub> effective layer;  $C_{HfO_2}$  is the total capacitance of the HfO<sub>2</sub> effective

layer. This  $\Delta\Phi$  induces a change in the conductive charge ( $\Delta Q = C_{HfO_2}\Delta\Phi$ ) in the MoS<sub>2</sub> channel. This  $\Delta Q$  can cause a shift of the threshold voltage ( $\Delta V_T$ ) measured from the back gate (note: not measured from the top gate), and  $\Delta V_T$  can be evaluated by  $\Delta V_T = \Delta Q / C_{SiO_2} = (C_{HfO_2} / C_{SiO_2})\Delta\Phi =$

$\frac{qN_{TNF}}{C_{SiO_2}}$ , where  $C_{SiO_2}$  is the capacitance of the back-gate dielectric layer. Furthermore,  $N_{TNF}$  can be calculated using  $N_{TNF} = \sigma_{TNF}A$ , where  $\sigma_{TNF}$  is the areal density of bound TNF- $\alpha$  molecules on

the effective layer and  $A$  is the total sensor area.  $C_{SiO_2}$  can be calculated using  $C_{SiO_2} = k_{SiO_2}\epsilon_0 A/d_{SiO_2}$ , where  $d_{SiO_2}$  and  $k_{SiO_2}$  are the thickness and dielectric constant of the SiO<sub>2</sub> back-gate dielectric layer, respectively;  $\epsilon_0$  is the vacuum permittivity. Therefore,

$$\Delta V_T = \frac{qN_{TNF}}{C_{SiO_2}} = \frac{qd_{SiO_2}\sigma_{TNF}}{k_{SiO_2}\epsilon_0}.$$

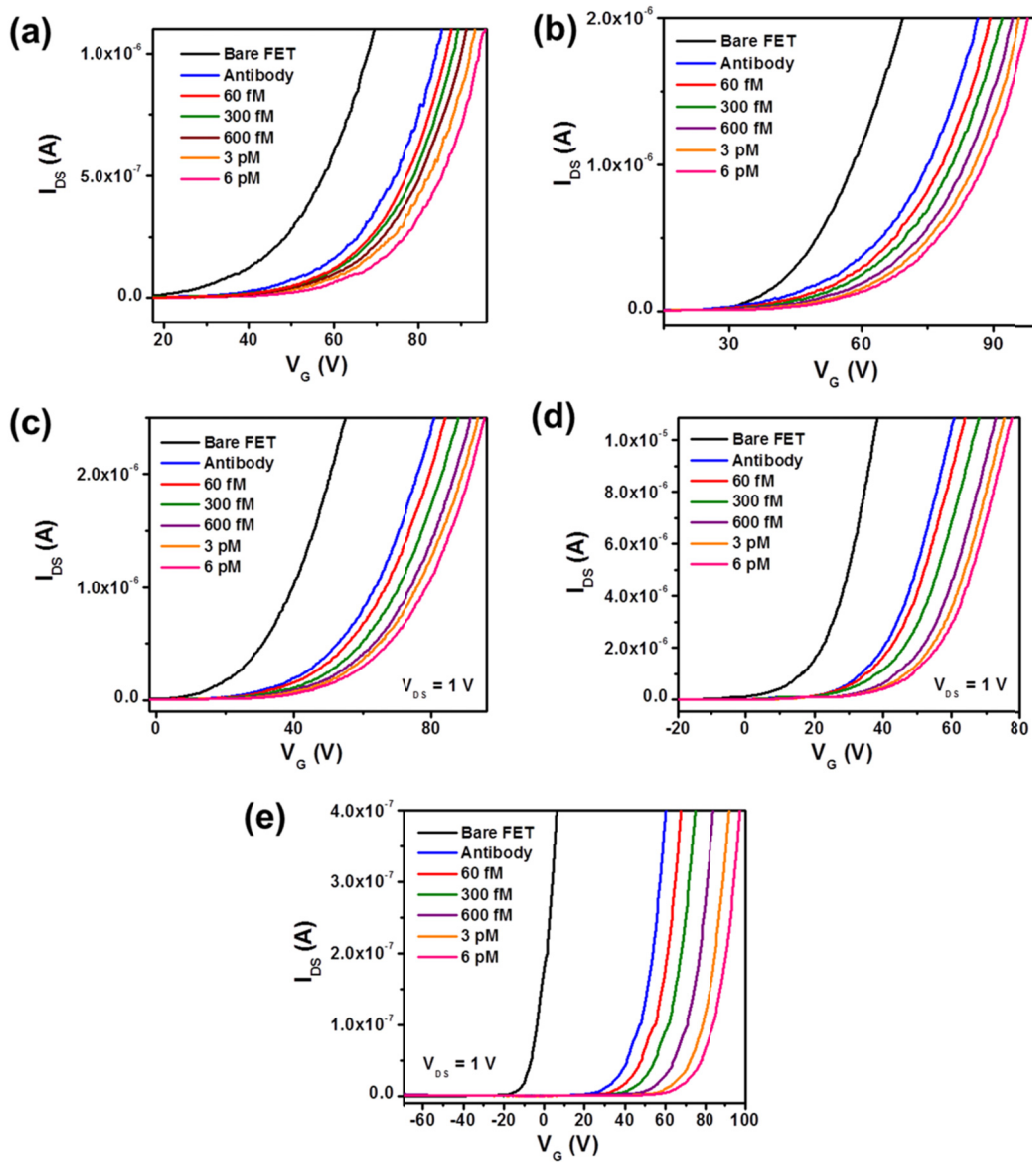

**Figure S3.** Linear-regime sensor responses at the equilibrium state: The transfer characteristics of five different MoS<sub>2</sub> transistor sensors measured at various biotransduction stages, following the sequence of (1) bare transistor, (2) antibody functionalization, and inputs of TNF- $\alpha$  solutions with concentrations of (3) 60 fM, (4) 300 fM, (5) 600 fM, (6) 3 pM, and (7) 6 pM. The calibrated linear-regime sensor responses from these five devices are plotted in Fig. 3 (b) with respect to TNF- $\alpha$  concentration.

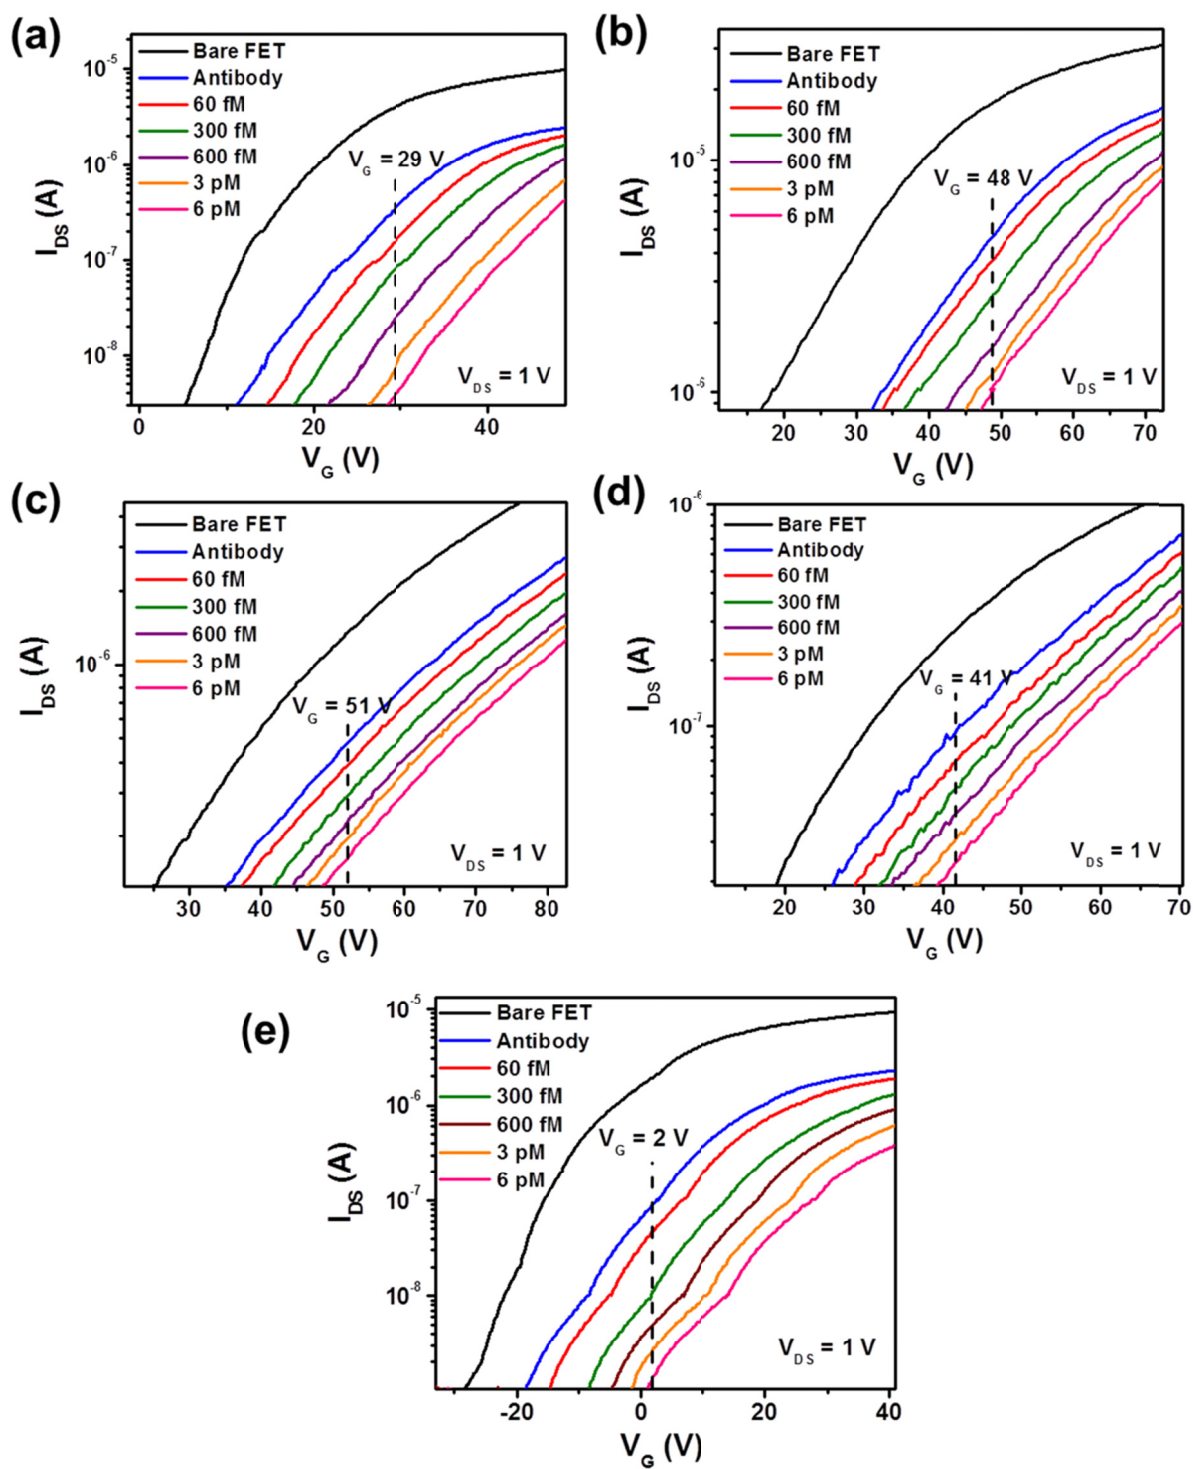

**Figure S4.** Subthreshold-regime sensor responses at the equilibrium state: The transfer characteristics of five different MoS<sub>2</sub> transistor sensors measured at various biodetection stages,

following the sequence of (1) bare transistor, (2) antibody functionalization, and inputs of TNF- $\alpha$  solutions with concentrations of (3) 60 fM, (4) 300 fM, (5) 600 fM, (6) 3 pM, and (7) 6 pM. The calibrated subthreshold-regime sensor responses from these five devices are plotted in Fig. 4 (b) with respect to TNF- $\alpha$  concentration.

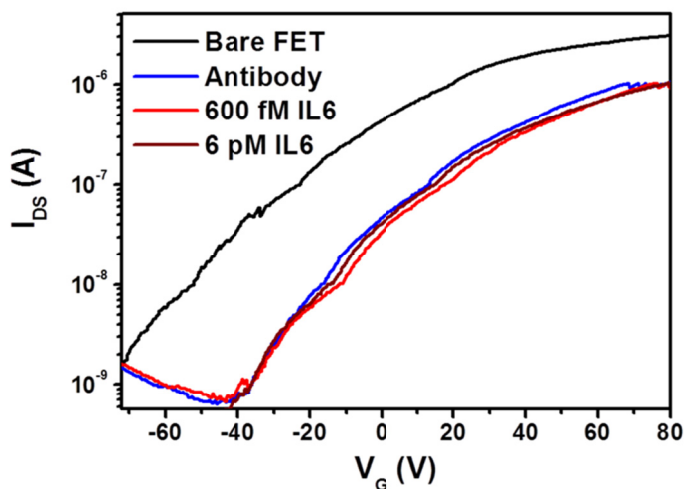

**Figure S5.** A negative control test of the detection specificity of MoS<sub>2</sub> transistor biosensors: The transfer characteristics of a control sensor measured at stages of (1) bare transistor, (2) antibody functionalization (still functionalized with anti-human TNF- $\alpha$  antibody receptors), and inputs of IL-6 solutions with concentrations of (3) 600 fM and (4) 6 pM.

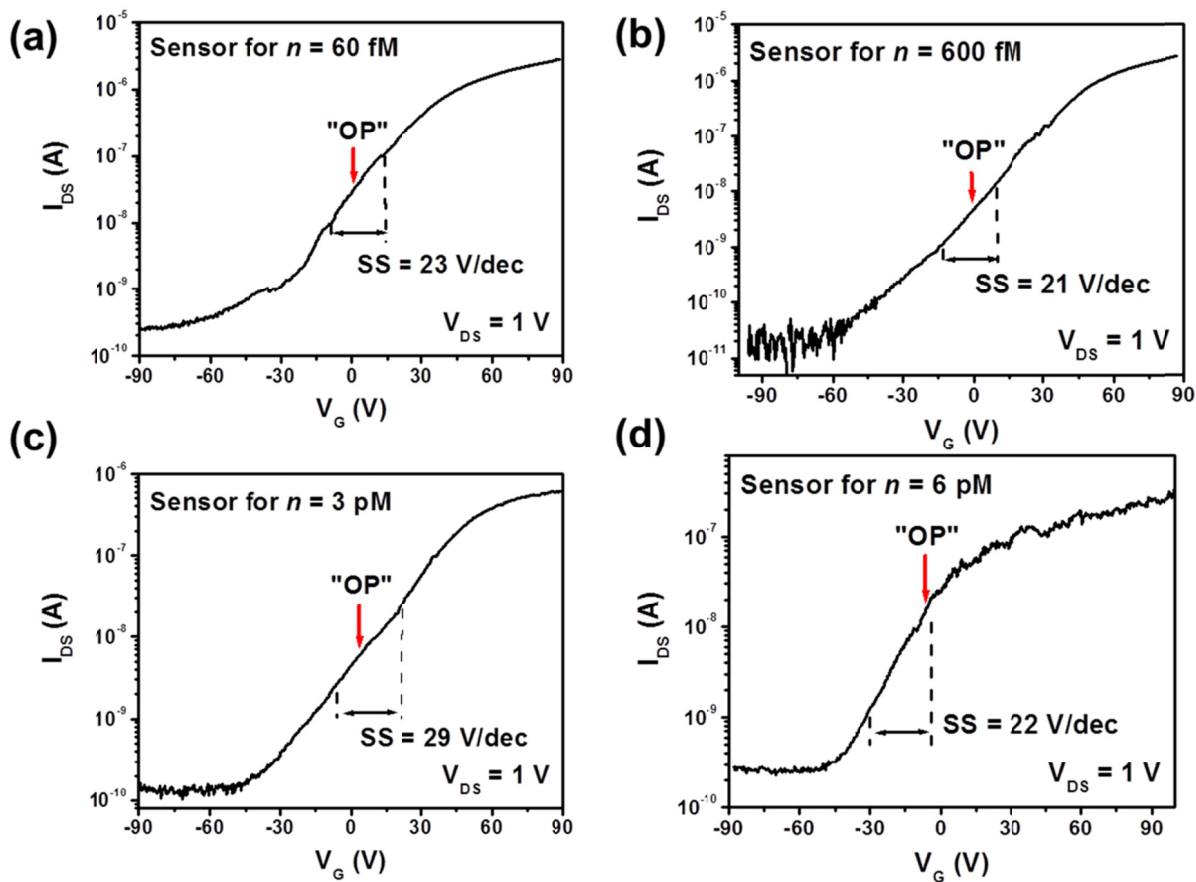

**Figure S6.** Transfer characteristics of four different MoS<sub>2</sub> transistor biosensors measured before the input of TNF- $\alpha$  samples, from which the subthreshold-swing ( $SS$ ) parameters were acquired for normalizing the real-time subthreshold-regime sensor responses (Equation (5)). These sensors were utilized to quantify the real-time kinetics of antibody-(TNF- $\alpha$ ) binding under different TNF- $\alpha$  concentrations ( $n$ ) of (a) 60 fM, (b) 600 fM, (c) 3 pM, and (d) 6 pM. The operation points (OP, *i.e.*, the fixed  $V_G$  and  $V_{DS}$  values, under which a real-time response curve was measured) are also labelled by the red arrows.



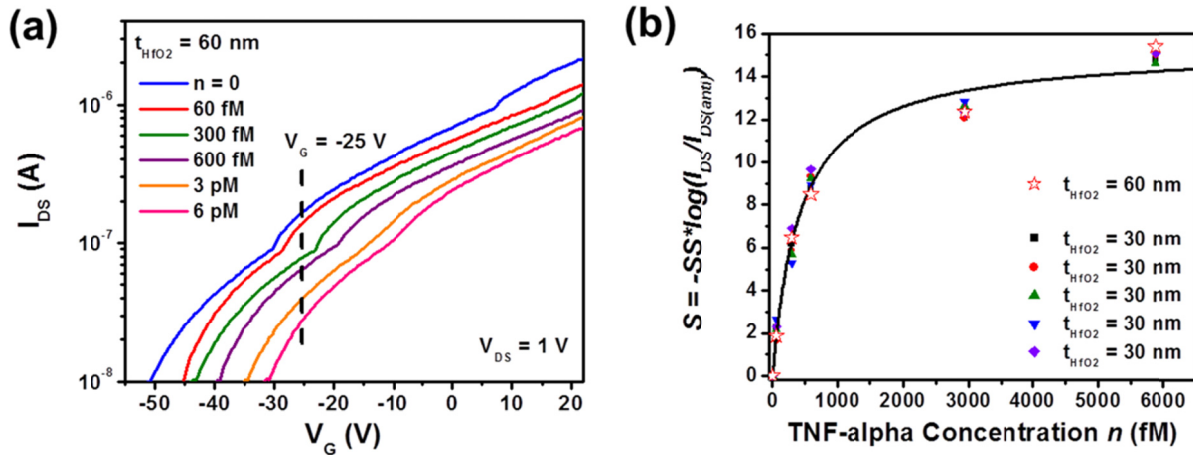

**Figure S7.** Sensor responses measured in the subthreshold regime of a MoS<sub>2</sub> transistor biosensor with a 60 nm thick HfO<sub>2</sub> effective layer (*i.e.*,  $t_{HfO_2} = 60$  nm): (a) transfer characteristics of the MoS<sub>2</sub> transistor sensor with  $t_{HfO_2} = 60$  nm, which were measured from a set of incremental TNF- $\alpha$  concentrations (*i.e.*,  $n = 0$ , 60 fM, 300 fM, 600 fM, 3 pM, and 6 pM; (b) The calibrated subthreshold-regime responses ( $S$ ) measured from this sensor (labelled as red stars) with respect to TNF- $\alpha$  concentration ( $n$ ). This  $S$ - $n$  relationship measured from this sensor with  $t_{HfO_2} = 60$  nm is consistent with those measured from the sensors with  $t_{HfO_2} = 30$  nm. This result proves that the calibrated sensor response values do not strongly depend on the HfO<sub>2</sub> effective layer thickness.
